# Supplementary material for: Temporal wetting property of “Micro” versus “Nano” rods of ZnO grown using the pressure dependent aqueous solution method
Source: Royal Society of Chemistry journal article supplement (doi:10.1039/c5nj01453k), 2015-01-01
Supplement: c5nj01453k1.pdf [file c5nj01453k1.pdf]

Supporting Informations

**Temporal wetting property of “Micro” versus “Nano” rods of ZnO grown using pressure dependent aqueous solution method**

**Akshaya K Behera,<sup>1,a</sup> Pritam Das,<sup>1,a</sup> Indrani Thakur,<sup>2</sup> Sriparna Chatterjee<sup>2,3</sup> and Shyamal Chatterjee<sup>1</sup>**

<sup>1</sup>*School of Basic Sciences, Indian Institute of Technology Bhubaneswar, Bhubaneswar 751007, India*

<sup>2</sup>*Colloids and Materials Chemistry Department, CSIR-Institute of Minerals and Materials Technology, Acharya Vihar, Bhubaneswar, 751013, India*

<sup>3</sup>*Academy of Scientific and Innovative Research (CSIR-AcSIR), New Delhi, India*

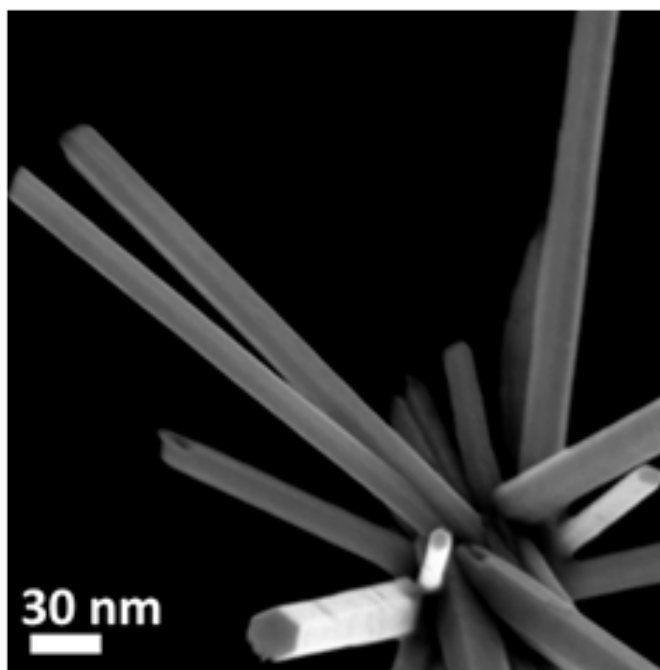

**S1: High magnification SEM image showing length of the nanorods.**

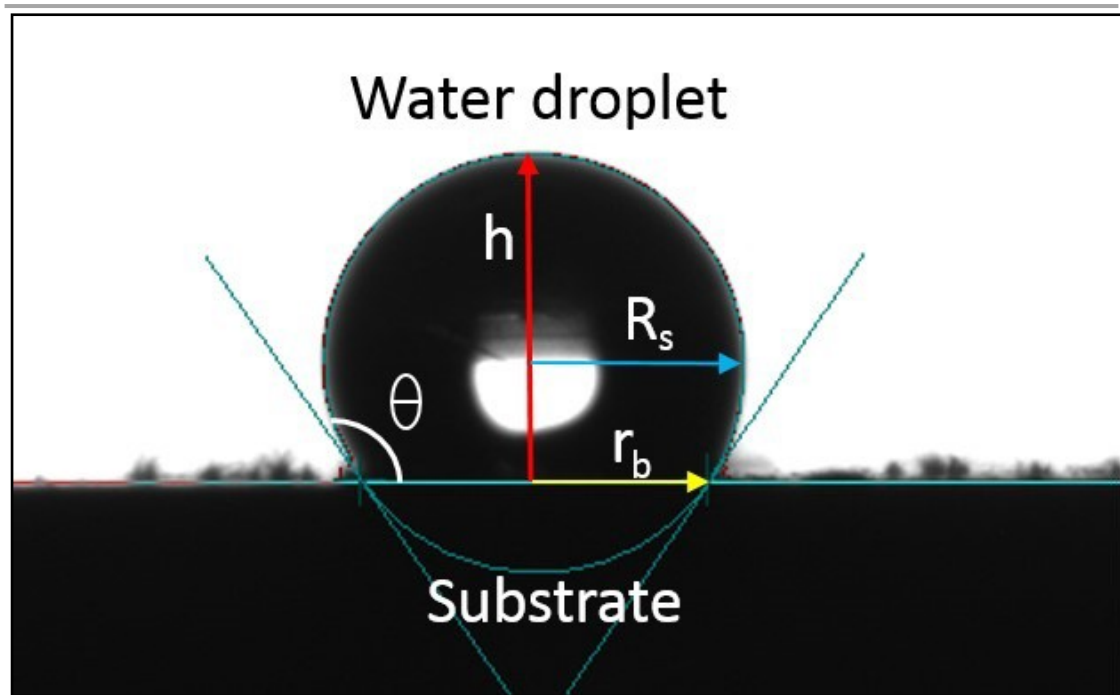

**Figure S2:** A typical water droplet on the substrate. Here height of the drop is denoted by  $h$ , contact radius by  $r_b$ , radius of sphere by  $R_s$  and the contact angle by  $\theta$ .

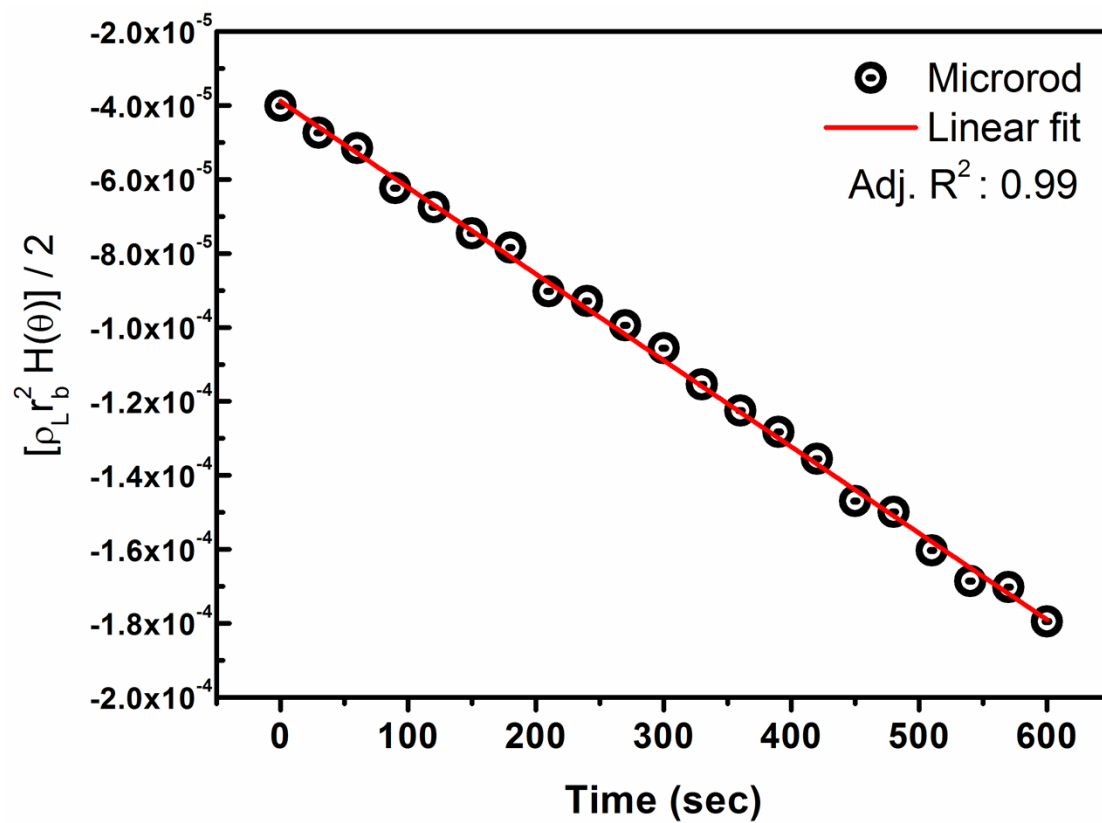

Figure S3: Plot of function  $\left(\frac{\rho_L r_b^2 H(\theta)}{2}\right)$  with time (t) for microrod surface.
